# Supplementary material for: Mitigating Hail Overforecasting in the 2-Moment Milbrandt-Yau Microphysics Scheme (v2.25.2_beta_04) in WRF (v4.5.1) by Incorporating the Graupel Spongy Wet Growth Process (MY2_GSWG v1.0)
Source: Copernicus journal article supplement (doi:10.5194/egusphere-2024-3834), 2025-02-12
Supplement: Supplementary file [file egusphere-2024-3834-AC2-supplement.pdf]

Reviewer #2

Comments on “Mitigating Hail Overforecasting in the 2-Moment Milbrandt-Yau Microphysics Scheme (v2.25.2\_beta\_04) in WRF (v4.5.1) by Incorporating the Graupel Spongy Wet Growth Process (MY2\_GSWG v1.0)” by Shaofeng Hua, Gang Chen, Baojun Chen, Mingshan Li, and Xin Xu.

Overall, this manuscript is well organized. The authors implemented the spongy wet growth process into a two-moment bulk cloud microphysics scheme in the WRF model to mitigate the overprediction of hail particles. Their approach is based on a thorough consideration of the physical mechanisms of hail formation and successfully reduces hail overprediction in heavy rainfall cases. In addition, the new setting was tested for hail events and was shown to reasonably reproduce hail distributions compared with ground-based radar observations. I have identified several that need clarification, but none of them are serious issues. Some revisions to the organization of the text are also needed to improve readability. Therefore, I recommend minor revision. Please see the detailed comments and suggestions below.

Reply: We sincerely appreciate your thorough and constructive comments on our manuscript “*Mitigating Hail Overforecasting in the 2-Moment Milbrandt-Yau Microphysics Scheme (v2.25.2\_beta\_04) in WRF (v4.5.1) by Incorporating the Graupel Spongy Wet Growth Process (MY2\_GSWG v1.0)*”. We have carefully considered all your valuable suggestions and provided a point-by-point response to each comment. Your insightful suggestions have significantly improved the clarity, organization, and scientific rigor of our work. Your thoughtful feedback has not only strengthened our manuscript but also deepened our understanding of the subject. We believe the revised version addresses all your concerns and hope it meets the journal's standards. Thank you again for your time and valuable input.

Main points on organization of text.

1. To improve readability, I suggest describing the results for the old and new settings in separate subsections. For example, subsection 3.1 could start at line 224 and subsection 3.2 at line# 374. Some content may need to be slightly revised accordingly.

Reply: Thanks for your advice. Section 3 (Results) has been divided into three subsections—“3.1 Results with the original MY2 scheme”, “3.2 Results with the modified MY2 scheme”, and “3.3 Hail formation mechanism”—to improve readability.

2. The Discussion and Summary sections should be clearly separated.

The Discussion section may include interpretations, speculations, or opinions, whereas the Summary section should concisely present only what authors did and the key findings derived from the study. After separating these sections, the outcomes will stand out more clearly. In addition, the current Summary section includes too much detailed explanation

for a summary. For instance, it may not necessary to rely on the specific case of Maiyu – the overprediction appears to be a more general tendency.

I believe the study's value will still be evident to readers even with a more concise Summary. For example, the last two paragraphs (lines 533-555) are not essential. If the authors consider them necessary, I recommend moving them to the newly separated Discussion section.

Reply: Thanks for your advice. We have restructured the final section into two distinct parts: Conclusion and Discussion, to ensure the Conclusion remains focused on summarizing our core findings. The original last two paragraphs have been slightly revised and moved to the Discussion section, where we highlight potential directions for future improvements to this study.

Specific comments.

1. Please spell out all abbreviations at their first occurrence. Line#105 MYJ, line#106 ACM2, and line#114 NTU, SBM.

Reply: Thanks for your advices. We have included the full terms of all abbreviations in the revised manuscript, 'MYJ', 'ACM2', 'NSSL', 'NTU' and 'SBM' refer to 'Mellor-Yamada-Janjic', 'Asymmetric Convective Model version 2', 'National Severe Storms Laboratory', 'National Taiwan University', and 'Spectral Bin Microphysics', respectively.

2. Line#140-142. The sentence is overly long, which makes the logical flow unclear. I recommend dividing it into shorter sentences to improve readability.

Reply: Thanks. It is revised as *“In the modified MY2 scheme, graupel particles are allowed to convert to hail only under specific conditions. This conversion occurs when the total amount of supercooled cloud droplets and raindrops collected by particles larger than a critical size, exceeds the amount required for their wet growth and for filling their internal voids to reach a density of  $900 \text{ kg m}^{-3}$  within one integration timestep”*.

3. Eqs.(1-10) Please clarify units and dimensions of  $Q_{cg}$ ,  $Q_{rg}$ ,  $Q_{gwet}$ , and  $Q_{fill}$ . In Eq. (9),  $Q_{gwet} dt$  is added to  $Q_{fill}$ . This indicates that  $Q_{gwet}$  and  $Q_{fill}$  have different dimensions, despite both using the same capital letter “Q”. This could be quite confusing for readers.

Reply: Thanks. The units of  $Q_{cg}$ ,  $Q_{rg}$ , and  $Q_{gwet}$  are all  $\text{kg m}^{-3} \text{ s}^{-1}$ , while  $Q_{fill}$  is expressed in  $\text{kg m}^{-3}$ . These unit definitions have now been explicitly stated in the revised manuscript.

4. Eq. (5)  $N(D)$  is necessary in the integral. In addition, please clarify the assumptions made to derive this formulation (e.g., particle shape and capacitance). Subsequently,

check whether these assumptions are consistent with those used for graupel in the MY scheme. In addition, it should be  $\geq$  instead of  $=$ , in my opinion.

Reply: We appreciate your comment. In response, we have now included the particle size distribution  $N(D)$  in Eq. (5). And, as noted in Musil (1970) and Milbrandt and Yau (2005a), graupel particles were treated as spherical, hence their capacitance ( $C$ ) equals the particle radius ( $r$ ). We have verified that all configurations and required parameters in Eqs. (1–10) are fully consistent with the original MY scheme. Regarding Eq. (5), which calculates the critical content for graupel wet growth, we retain the equal sign (" $=$ ") in the equation for physical correctness. To improve clarity, the following sentences have been incorporated into the revised manuscript: *"In the derivations of Eq. (5) by Musil (1970) and Milbrandt and Yau (2005a), graupel particles were assumed to be spherical, and their capacitance was set equal to the graupel particle radius. Eq. (5) indicates that when the supercooled water content exceeds  $Q_{g_{wet}}$ , all graupel particles with diameters larger than  $D^*$  will undergo wet growth"*.

5. Line#148. Is  $E_{cg}$  constant? Please specify its value. In general,  $E_{cg}$  depends on particle sizes and shapes (cf. Böhm, 1999). Some models explicitly consider the dependence using look-up-table or an approximated formulation.

Böhm, J. P., 1999: Revision and clarification of "A general hydrodynamic theory for mixed-phase microphysics." *Atmospheric Research*, 52, 167–176, [https://doi.org/10.1016/S0169-8095\(99\)00033-2](https://doi.org/10.1016/S0169-8095(99)00033-2).

Reply: Thanks for your comments. The value of  $E_{cg}$  is consistent with the Milbrandt scheme and is calculated based on the study by Cober and List (1993), which is a function of the mass-weighted mean diameters of cloud droplets and graupel particles. The relevant sentence is reworded as *" $E_{cg}$  is the collecting efficiency between graupel and cloud, which is function of the mass-weighted mean diameters of cloud droplets and graupel particles (Cober and List, 1993)"*.

## Reference

Cober, S. G., and R. List: Measurements of the Heat and Mass Transfer Parameters Characterizing Conical Graupel Growth. *J. Atmos. Sci.*, 50, 1591–1609, [https://doi.org/10.1175/1520-0469\(1993\)050<1591:MOTHAM>2.0.CO;2](https://doi.org/10.1175/1520-0469(1993)050<1591:MOTHAM>2.0.CO;2), 1993.

6. In Eq. (4), I don't find the terms related to " $|wg(Dg) - wr(Dr)| \approx \sqrt{(VQg - VQr)^2 + 0.04VQgVQr}$ "

Reply: We apologize that there was an error in Eq. (4). We have now corrected and rewritten the equation as follows:

$$Q_{rg} = \sqrt{(V_{Qg} - V_{Qr})^2 + 0.04V_{Qg}V_{Qr}\rho_w \frac{\pi^2}{24} E_{rg} N_{Tr} N_{0g} e^{-\lambda_g D^*} \left[ \frac{\Gamma(4)}{\lambda_r^3} \left( \frac{D^{*2}}{\lambda_g} + \frac{2D^*}{\lambda_g^2} + \frac{2}{\lambda_g^3} \right) + \frac{2\Gamma(5)}{\lambda_r^4} \left( \frac{D^*}{\lambda_g} + \frac{1}{\lambda_g^2} \right) + \frac{\Gamma(6)}{\lambda_r^5} \frac{1}{\lambda_g} \right]}$$

7. Eq. (9) I think it should be as follows (in fortran coding):

If ( {(Qrg+Qcg)dt≥Qgwetdt } .and. {(Qrg+Qcg)dt≥Qfill } ) then

Wet growth occurs

Else

Dry growth occurs

End if

Why do authors add (Qrg+Qcg)dt to Qfill ?

Reply: In our code, the approach is as follows:

If ((Qrg+Qcg)\*dt ≥ (Qgwet\*dt +Qfill)) then

Wet growth occurs

Else

Dry growth occurs

End if

That means the wet growth of graupel occurs only when the amount of supercooled liquid water it collected ((Qrg+Qcg)\*dt) exceeds the sum of the amount required to raise their surface temperature to 0°C (Qgwet\*dt), and the amount needed to fill their internal voids (Qfill). We did not add (Qrg+Qcg)\*dt to Qfill. For clarity, the following is added in the revised manuscript “*In the modified MY2 scheme, we specify that graupel particles larger than D\* undergo wet growth and convert to hail only when the amount of supercooled liquid water they collected ((Qrg + Qcg)dt) exceeds the sum of the amount required to raise their surface temperature to 0°C (Qgwetdt), and the amount needed to fill their internal voids (Qfill)*”.

8. Line#183-185. This is a very good approach.

Reply: We appreciate your affirmation.

9. Figure 1. Please label “Rainstorm1” in the figures as (a) Rainstrom1 (2022-06-23\_12:00) to improve readability, as readers may not be particularly interested in the specific date and time of the event here.

Reply: Thanks. Figure 1 is replotted according to your suggestion, which is shown below.

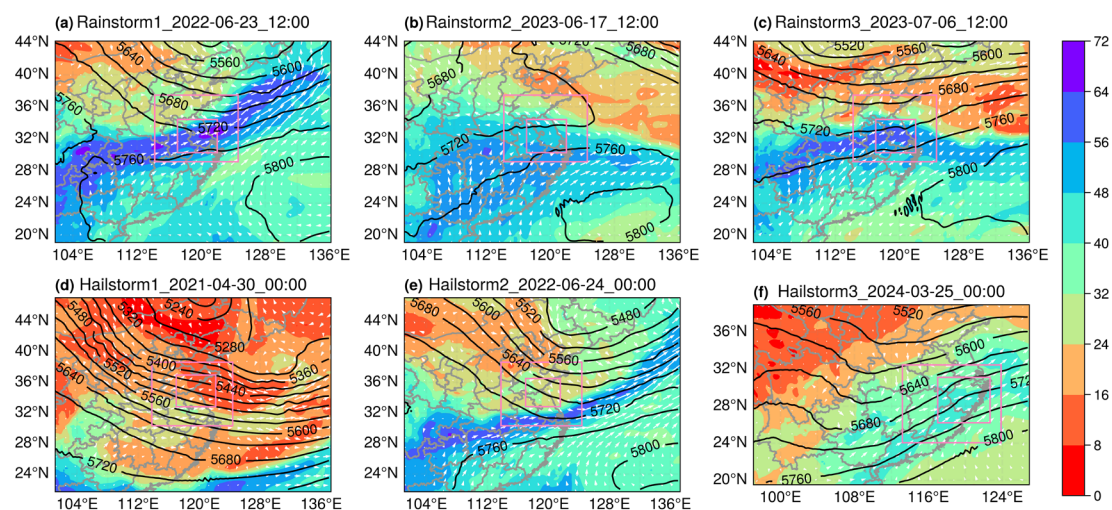

Figure R1. The same as Figure 1 in the revised manuscript.

10. Line#253-255. The reason provided for not using the radar simulator is not entirely justified. Radar simulators are designed to enable consistent comparisons between observations and models, thereby reducing uncertainties. However, if the authors argue that the numerical model does not incorporate representations of ice particle nonsphericity—an essential factor for sensitivity to polarization—then the benefits of using a simulator would indeed be limited. In that case, citing previous studies (e.g., Matsui et al., 2020) would help clarify and support this point.

Matsui, T., B. Dolan, T. Iguchi, S. A. Rutledge, W. Tao, and S. Lang, 2020: Polarimetric Radar Characteristics of Simulated and Observed Intense Convective Cores for a Midlatitude Continental and Tropical Maritime Environment. *J. Hydrometeor.*, 21, 501–517, <https://doi.org/10.1175/JHM-D-19-0185.1>

Reply: Thanks for your advice. The relevant sentence is reworded as “*We did not use the method of first calculating the dual-polarization variables of the simulation results with a radar simulator and then identifying hail using the same hydrometeor classification algorithm as in the observations, since MY2 scheme lacks proper treatment of ice particle shapes, which are essential for polarization sensitivity, resulting in limited benefits from using a simulator (Matsui et al., 2020)*”.

11. Line#293. Please move the location of only as “0.1 g kg<sup>-1</sup> is only observed only above 3000 m”

Reply: Thanks. It is revised.

12. Figure 5c, 5g, 5k. It is very difficult to distinguish the gray lines and color shades. Please change the visualization of the figures.

Reply: We adjusted the y-axis range in the third column of Figure 5 to 3000-12000 m to better display the mass-weighted diameters of graupel and hail particles. Additionally, we plotted the mass-weighted diameters of graupel at 1mm intervals from 2 to 10 mm (with fewer lines since graupel diameters rarely exceed 3 mm). The modified figure presented below should more effectively demonstrate that the mass-weighted diameters of hail particles are typically larger than those of graupel particles.

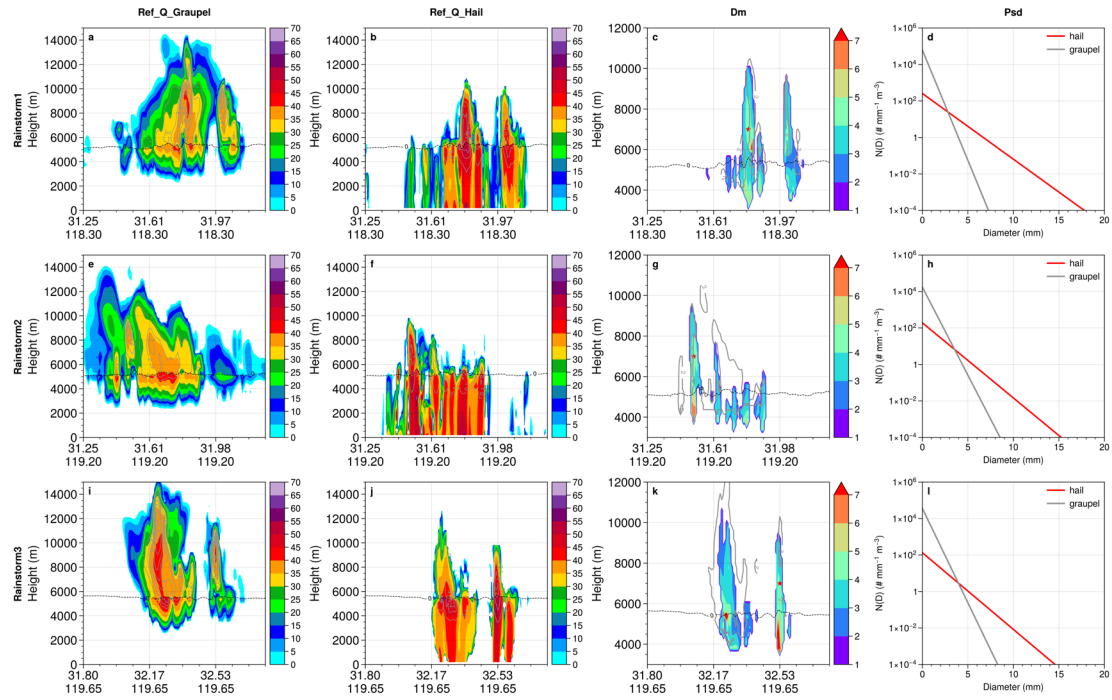

Figure R2. The same as Figure 4 in the revised manuscript.

13. Line#354-359. I don't reach the same conclusion from Eq. (11). Please refer to the following figure, which is based on Eq. (11). In addition, this figure does not resemble the one presented in Khain et al. (2010). According to Khain et al., their Figure 14 was derived using a look-up table. Therefore, I conclude that Eq. (11) in this manuscript may not be valid for certain (qc+qr) or Tc ranges. Please clarify specific form of the SLL used in the MY scheme implemented in the WRF model.

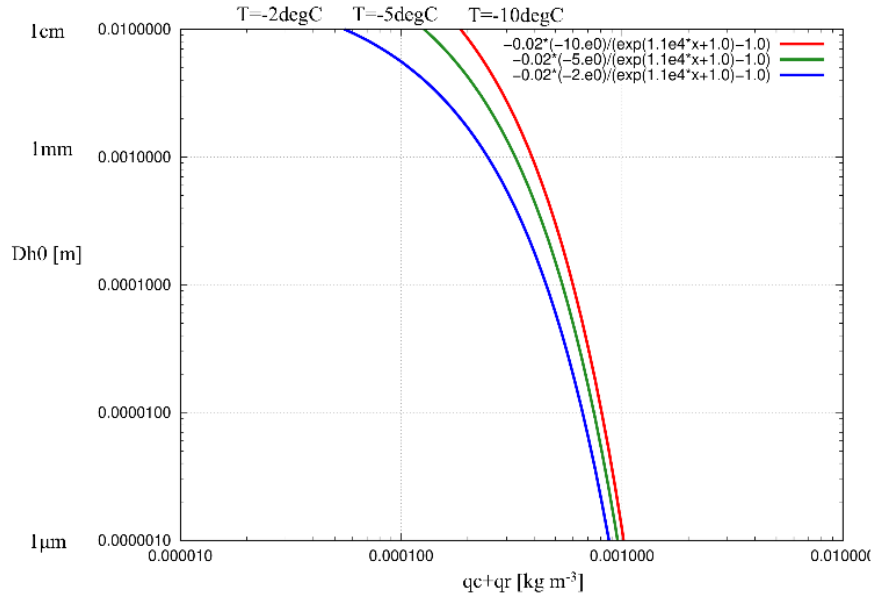

Reply: We sincerely apologize if the presentation of Eq. (11) was unclear, which may have led to a misunderstanding of the formula. Here,  $-T_c$  should be part of the exponent of the natural exponential  $e$ , rather than being a numerator divided by  $e$ 's exponential term. In the revised manuscript, we have added parentheses to the exponent of  $e$  in Eq. (11) to prevent similar confusion. The revised Eq. (11) is

$$D_{h0} = 0.02 \times \left( e^{\left( \frac{-T_c}{1.1 \times 10^4 (q_c + q_r) + 1} \right)} - 1 \right)$$

14. Line #369-371 (For instance,  $\sim -2$  degC). This sentence is difficult to follow due to the dense listing of conditions. Please consider rephrasing it using semi colons and clearer parallel structure to improve readability.

Reply: Thanks. It is revised as “*For instance, they excluded the process of graupel collecting supercooled raindrops when calculating  $D_{h0}$ ; limited the conversion amount to no more than one-tenth of the graupel mass; and prevented conversions at temperatures warmer than  $-2$  °C.*”

15. Line # 379. “a noticeable decrease” is overemphasized.

Reply: Thanks, “noticeable” is removed.

16. Line#424. “conditions” is better than “locations”.

Reply: Thanks, it is replaced.

17. Figure 11b. The boxes are too thin to distinguish colors. Please use wider boxes as in Figure 11a.

Reply: It is replotted as you suggested.

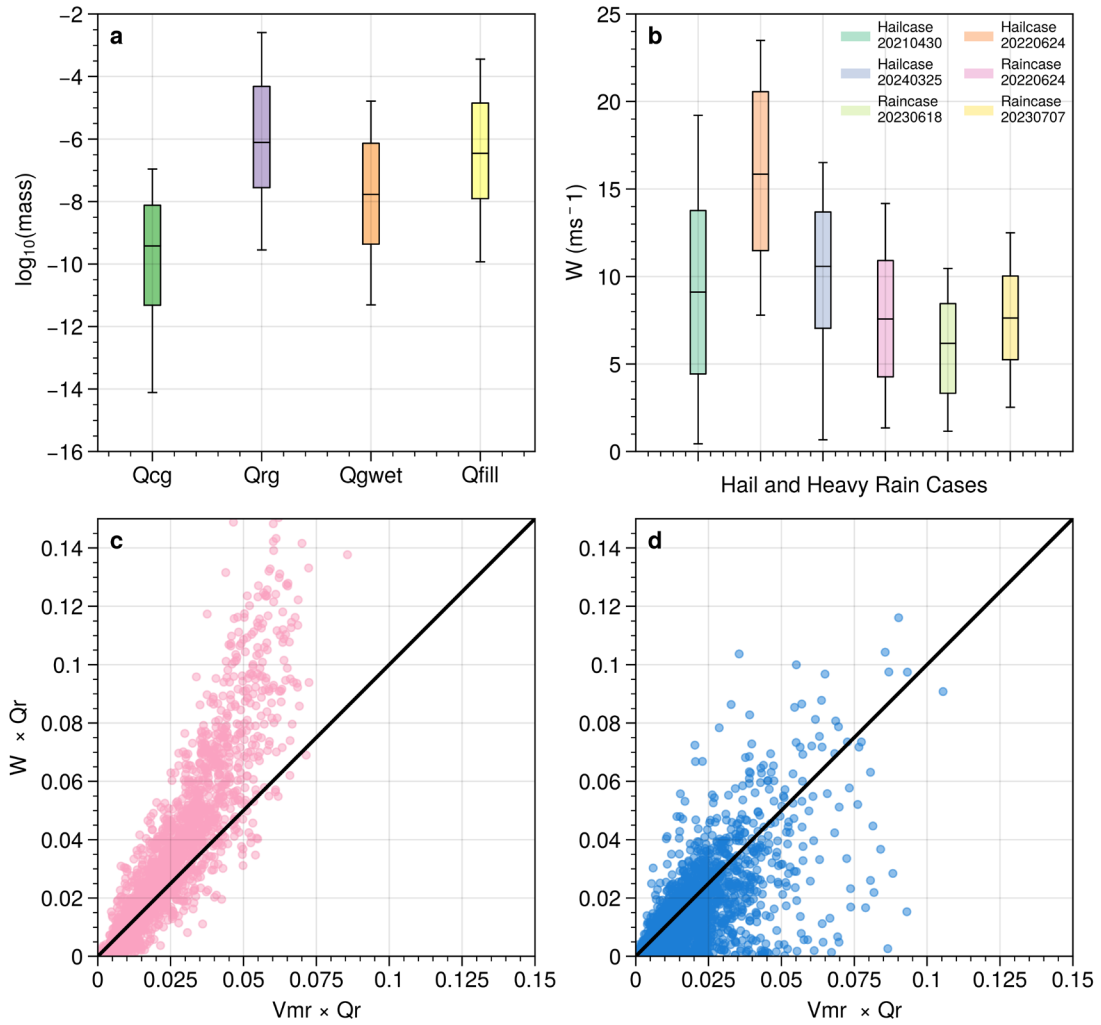

Figure R3. The same as Figure 11 in the revised manuscript.

18. Line#452-454. This sentence is about heavy rainfall cases. So, the terms “in hail events” is very confusing.

Reply: We have adjusted the sentence structure, and the revised version is as follows: “*It was found that, in heavy rainfall cases, the vertical velocity in regions corresponding to those where graupel-to-hail conversion occurs in hail events is significantly lower, generally less than  $10 \text{ m s}^{-1}$ . Additionally, in heavy rainfall events, the vertical velocity does not significantly exceed the terminal fall velocity of raindrops, limiting the upward transport of raindrops to graupel regions and mitigating the hail formation process. In contrast, in hail events the vertical velocity in graupel-to-hail conversion regions generally exceeds the terminal fall velocity of raindrops, facilitating the upward transport of raindrops to graupel particles, thereby initiating the graupel-to-hail conversion process*”.

19. Line#466. Fig. 9 is a typo.

Reply: Thanks, it is revised to “Fig. 12”.

20. Line# 473-475. This phenomenon is well described by the cold-pool-shear interaction (e.g., Weisman and Rotunno, 2004).

Weisman, M. L., and R. Rotunno, 2004: “A Theory for Strong Long-Lived Squall Lines” Revisited. J. Atmos. Sci., 61, 361–382, [https://doi.org/10.1175/1520-0469\(2004\)061<0361:ATFSLS>2.0.CO;2](https://doi.org/10.1175/1520-0469(2004)061<0361:ATFSLS>2.0.CO;2).

Reply: The cold-pool-shear interaction is more pronounced in hail cases, particularly in Hailcase1, where a distinct negative buoyancy zone associated with cold pool is observed below 2 km. Although the updraft exhibits slight tilting, it remains predominantly upright, indicating a near-balance state between the cold pool and environmental shear, which is a key factor contributing to this severe hailstorm event. In contrast, cold pools may not be as evident in heavy rainfall cases. In Meiyu frontal systems, abundant moisture likely suppresses rainfall evaporation, thereby weakening cold pool intensity. Consequently, the convective systems producing heavy rainfall under Meiyu fronts may not be primarily driven by cold pool.

The following is added in the revised manuscript: *“In the hailstorm cases, particularly in Hailcase1, a negative buoyancy zone formed by the cold pool is present below 2 km altitude. The quasi-upright updraft structure indicates a dynamic equilibrium between the cold pool and environmental shear, consistent with the RKW theory (Weisman and Rotunno 2004), which favored the sustained severe convection”*.
